# Supplementary material for: Water-soluble diiron hexacarbonyl complex as a CO-RM: controllable CO-releasing, releasing mechanism and biocompatibility
Source: Royal Society of Chemistry journal article supplement (doi:10.1039/c3dt51281a), 2013-01-01
Supplement: c3dt51281a.pdf [file c3dt51281a.pdf]

## Electronic supplementary information

### 1. Figures

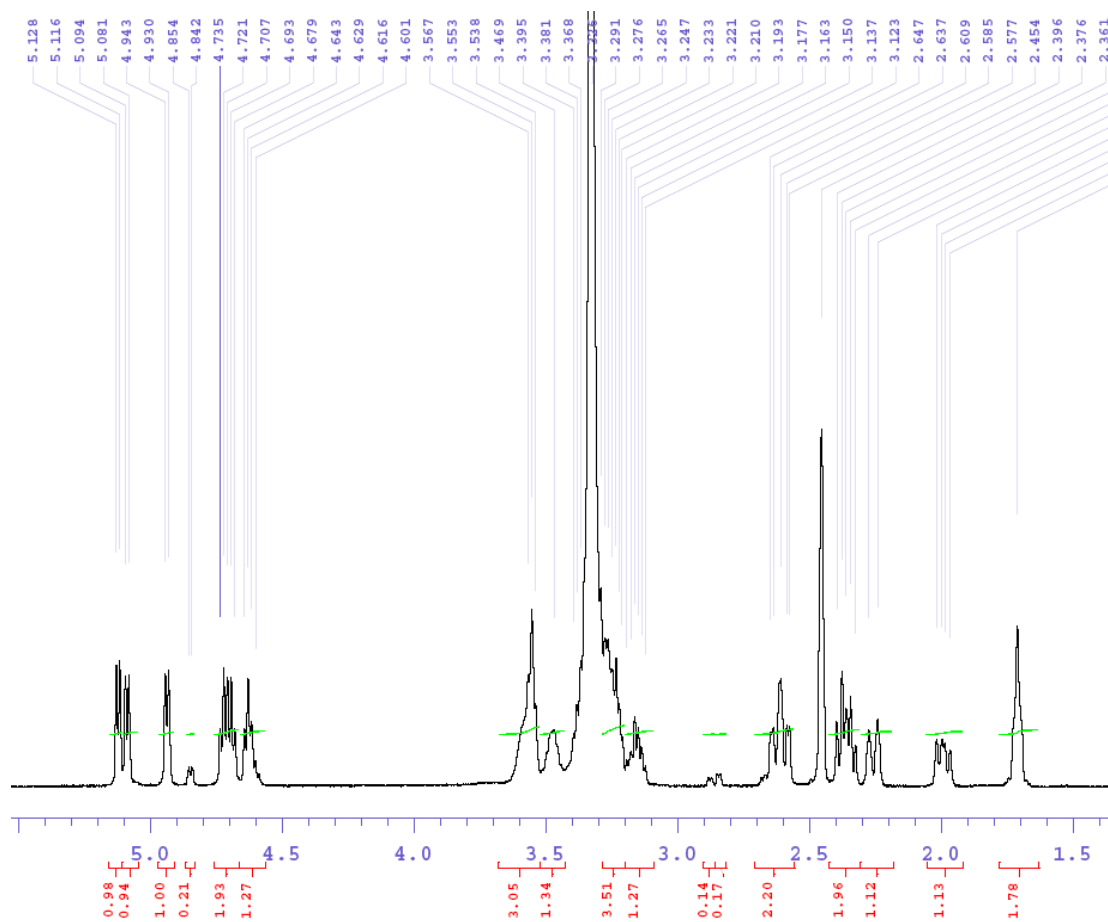

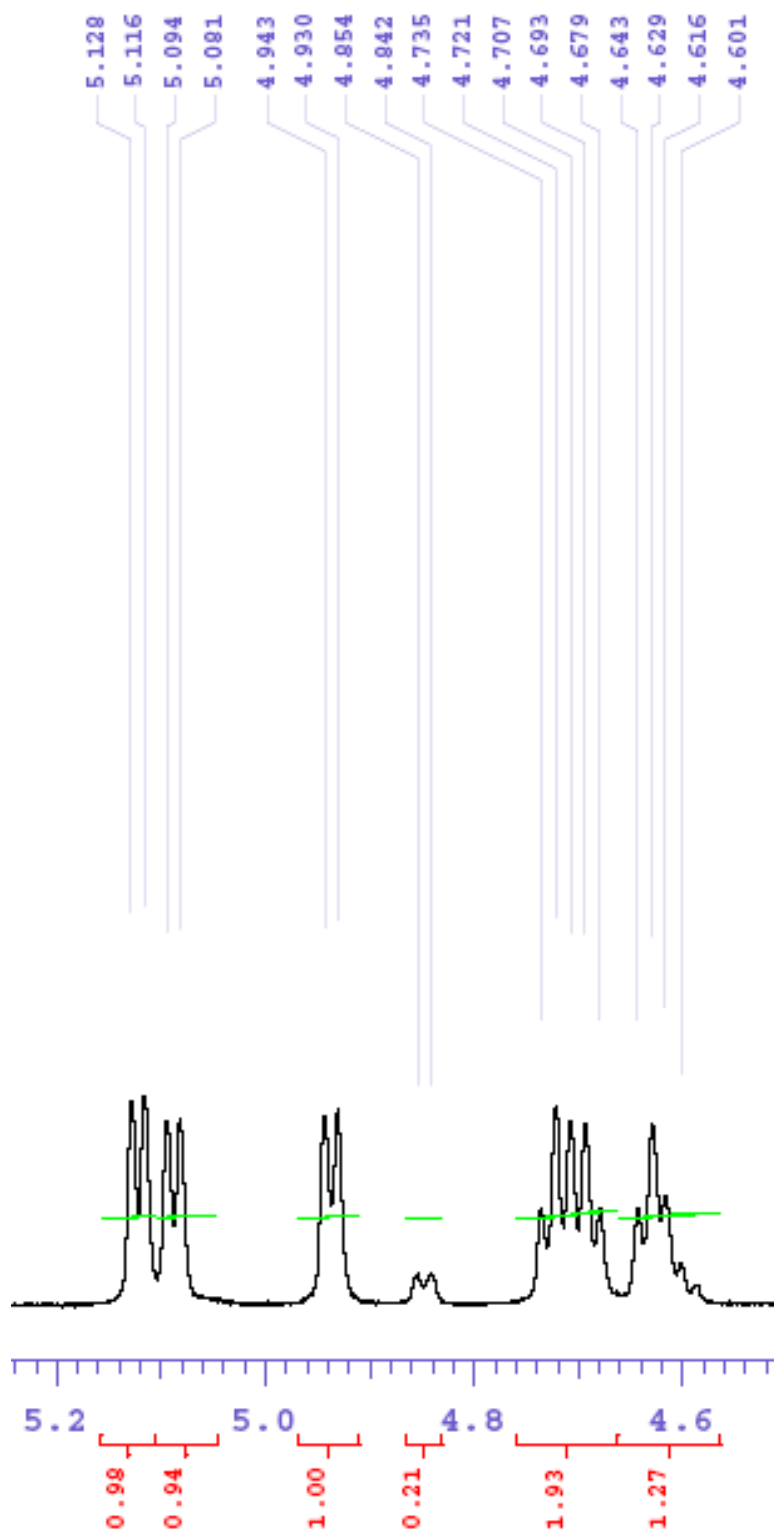

Fig. S1  $^1\text{H}$  NMR of complex 1 with relatively lesser ee isomer.

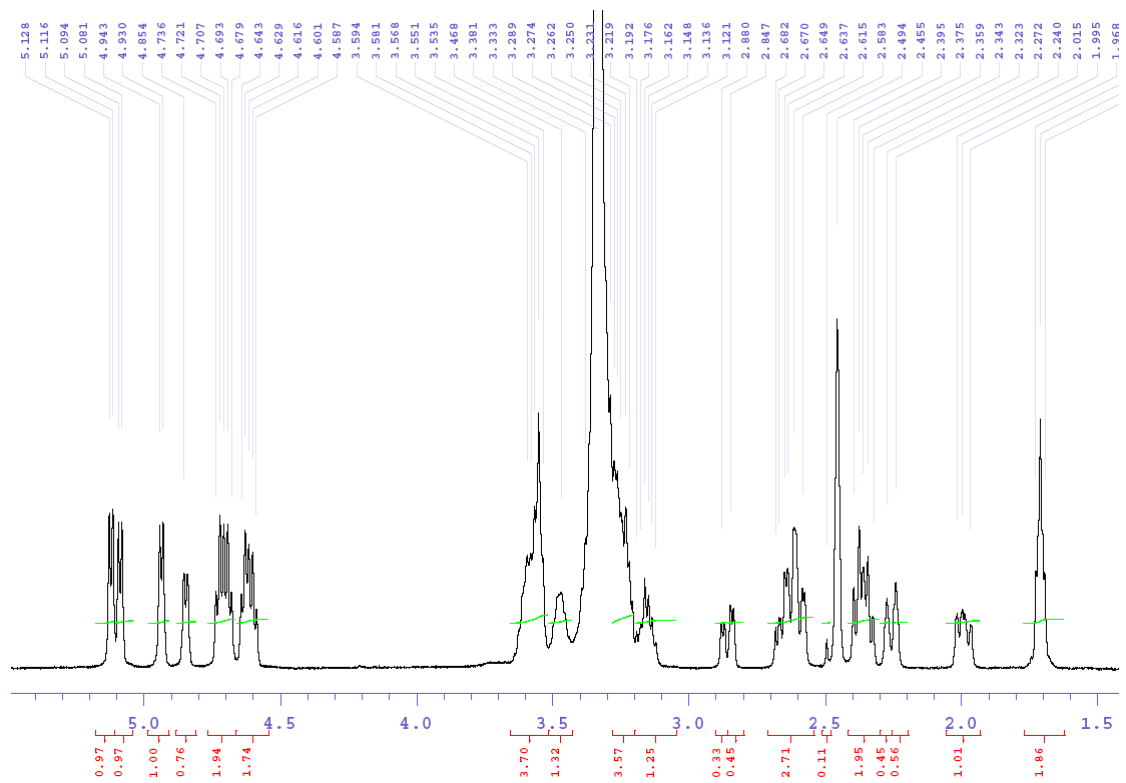

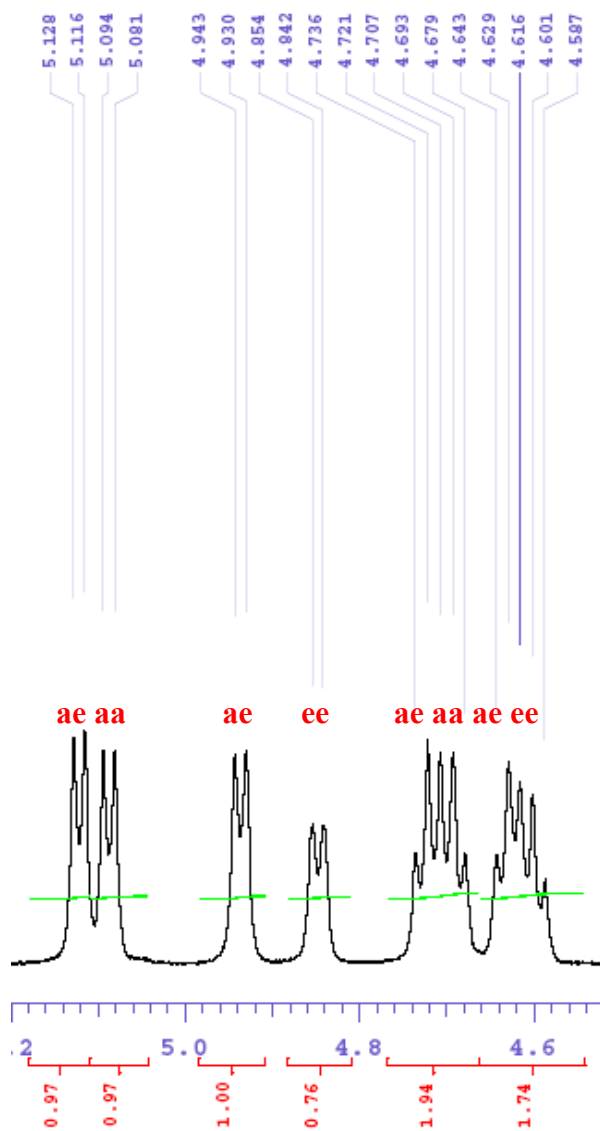

Fig. S2  $^1\text{H}$  NMR of complex **1** with relatively more ee isomer.

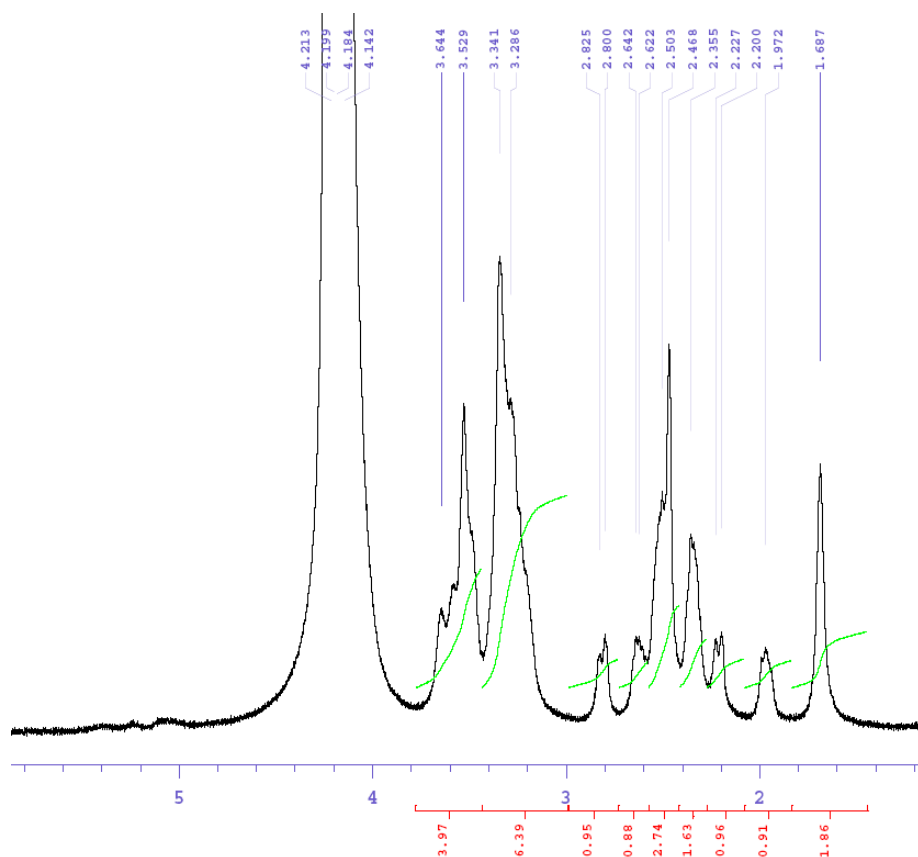

Fig. S3 Identifying the signals of OH groups of complex 1 by addition of D<sub>2</sub>O.

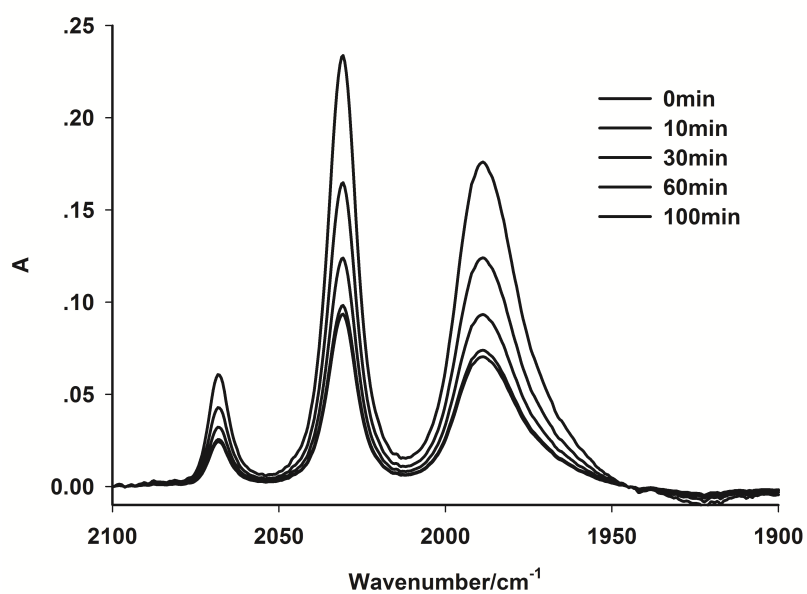

Fig. S4 Spectral variation of complex 1 ( $C = 4.0 \text{ mmol L}^{-1}$ ) with its reaction of dithionite ( $C = 40 \text{ mmol L}^{-1}$ ) in DMSO at  $37 \text{ }^\circ\text{C}$  under inert atmosphere.

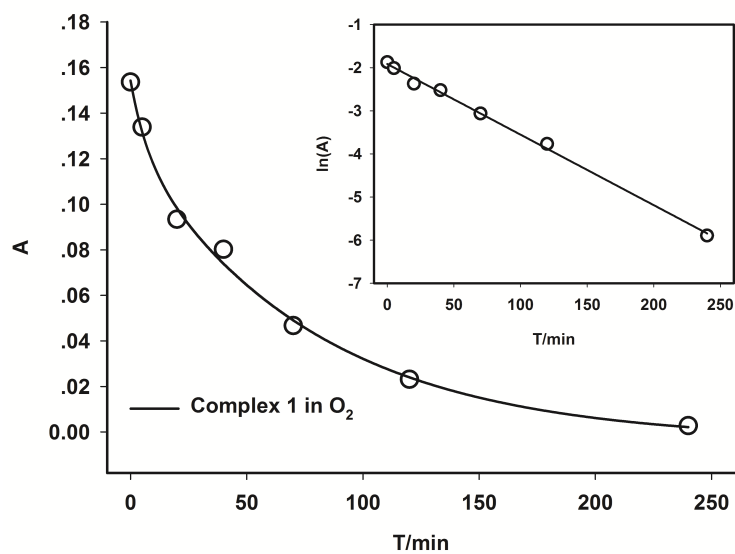

Fig. S5 Plot of the concentrations of complex **1** against reaction time ( $[\text{CysA}] = 0.069 \text{ mol L}^{-1}$ ,  $[\mathbf{1}] = 0.011 \text{ mol L}^{-1}$ ) and its logarithmic plot (inset) in O<sub>2</sub>. Please note that the absorbance used for the kinetic analysis was at  $2068 \text{ cm}^{-1}$ .

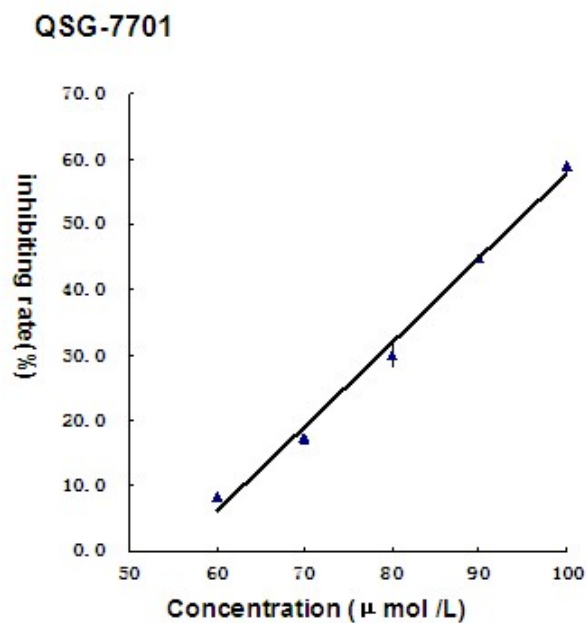

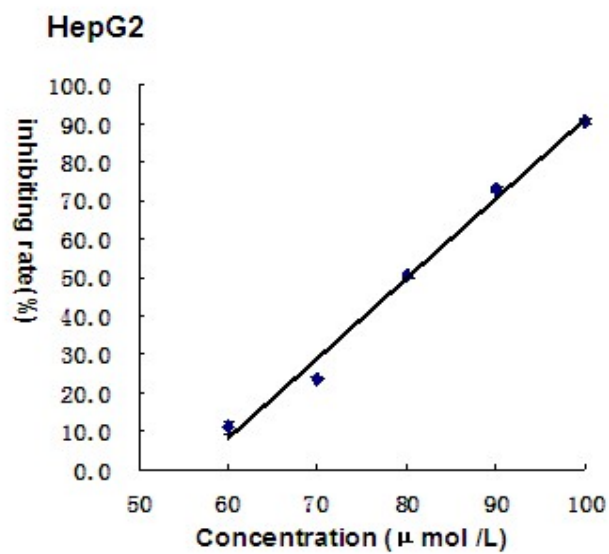

Fig. S6 Correlation plots for the estimation of  $\text{IC}_{50}$  values.

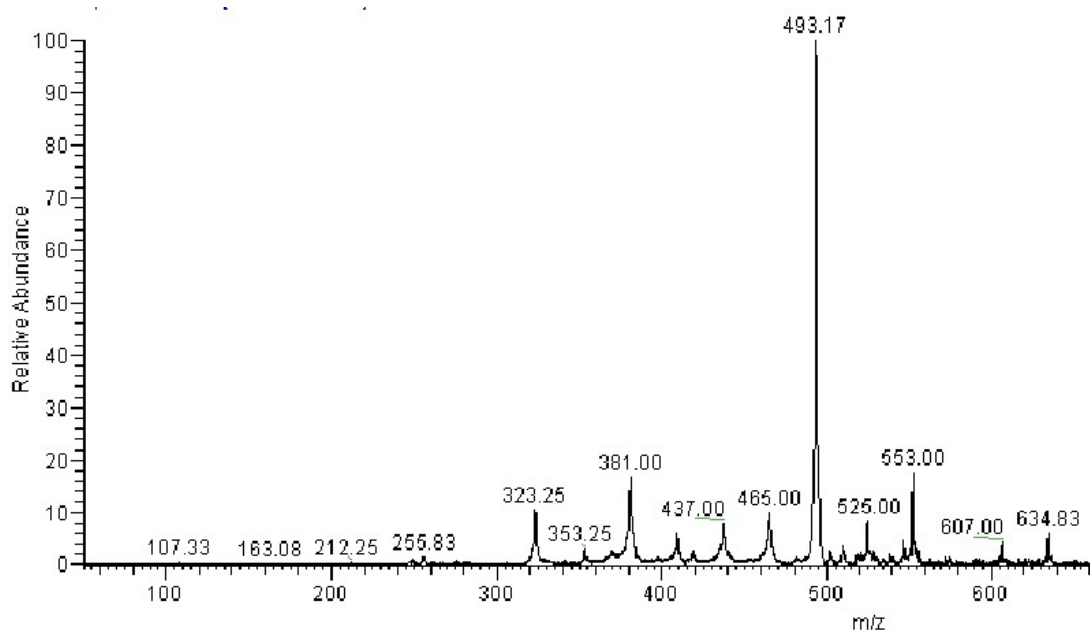

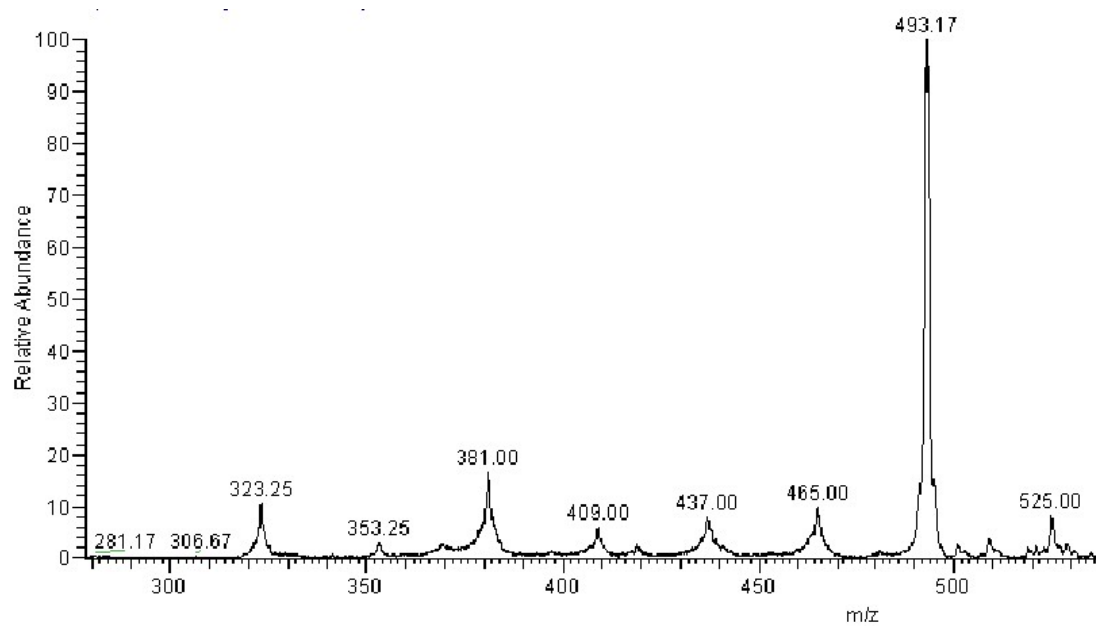

Fig. S7 Mass spectra of complex 1 (ESI, negative).

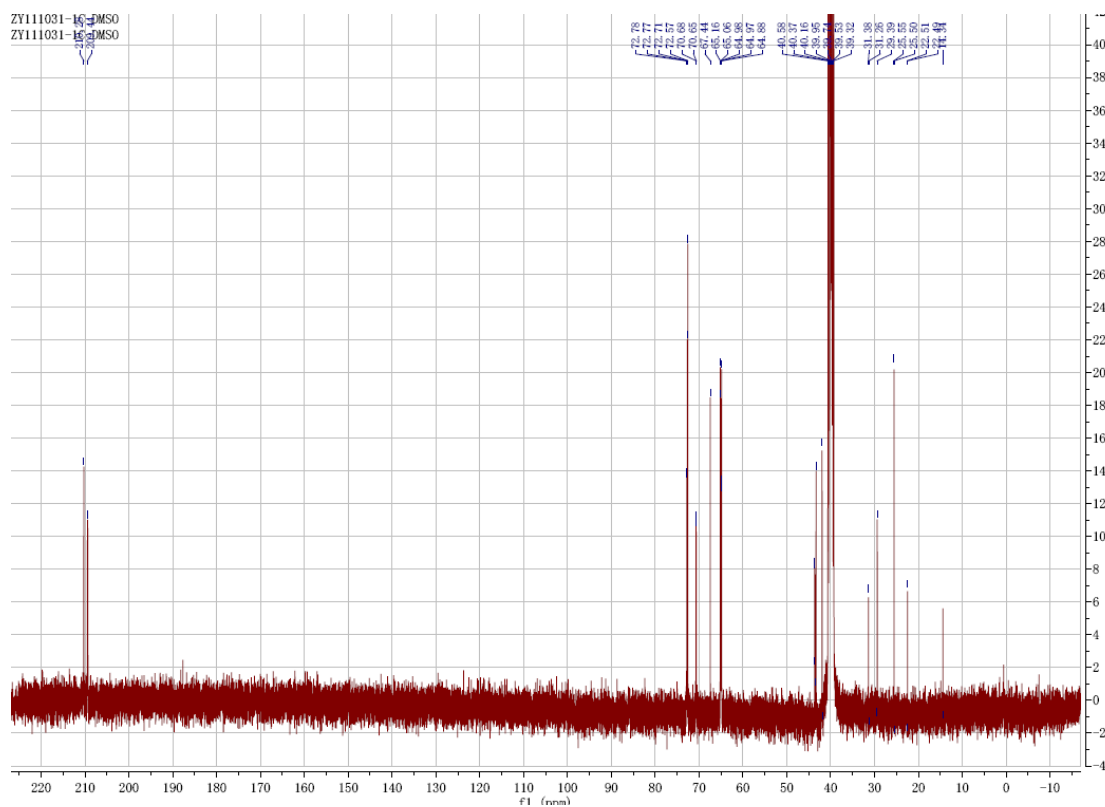



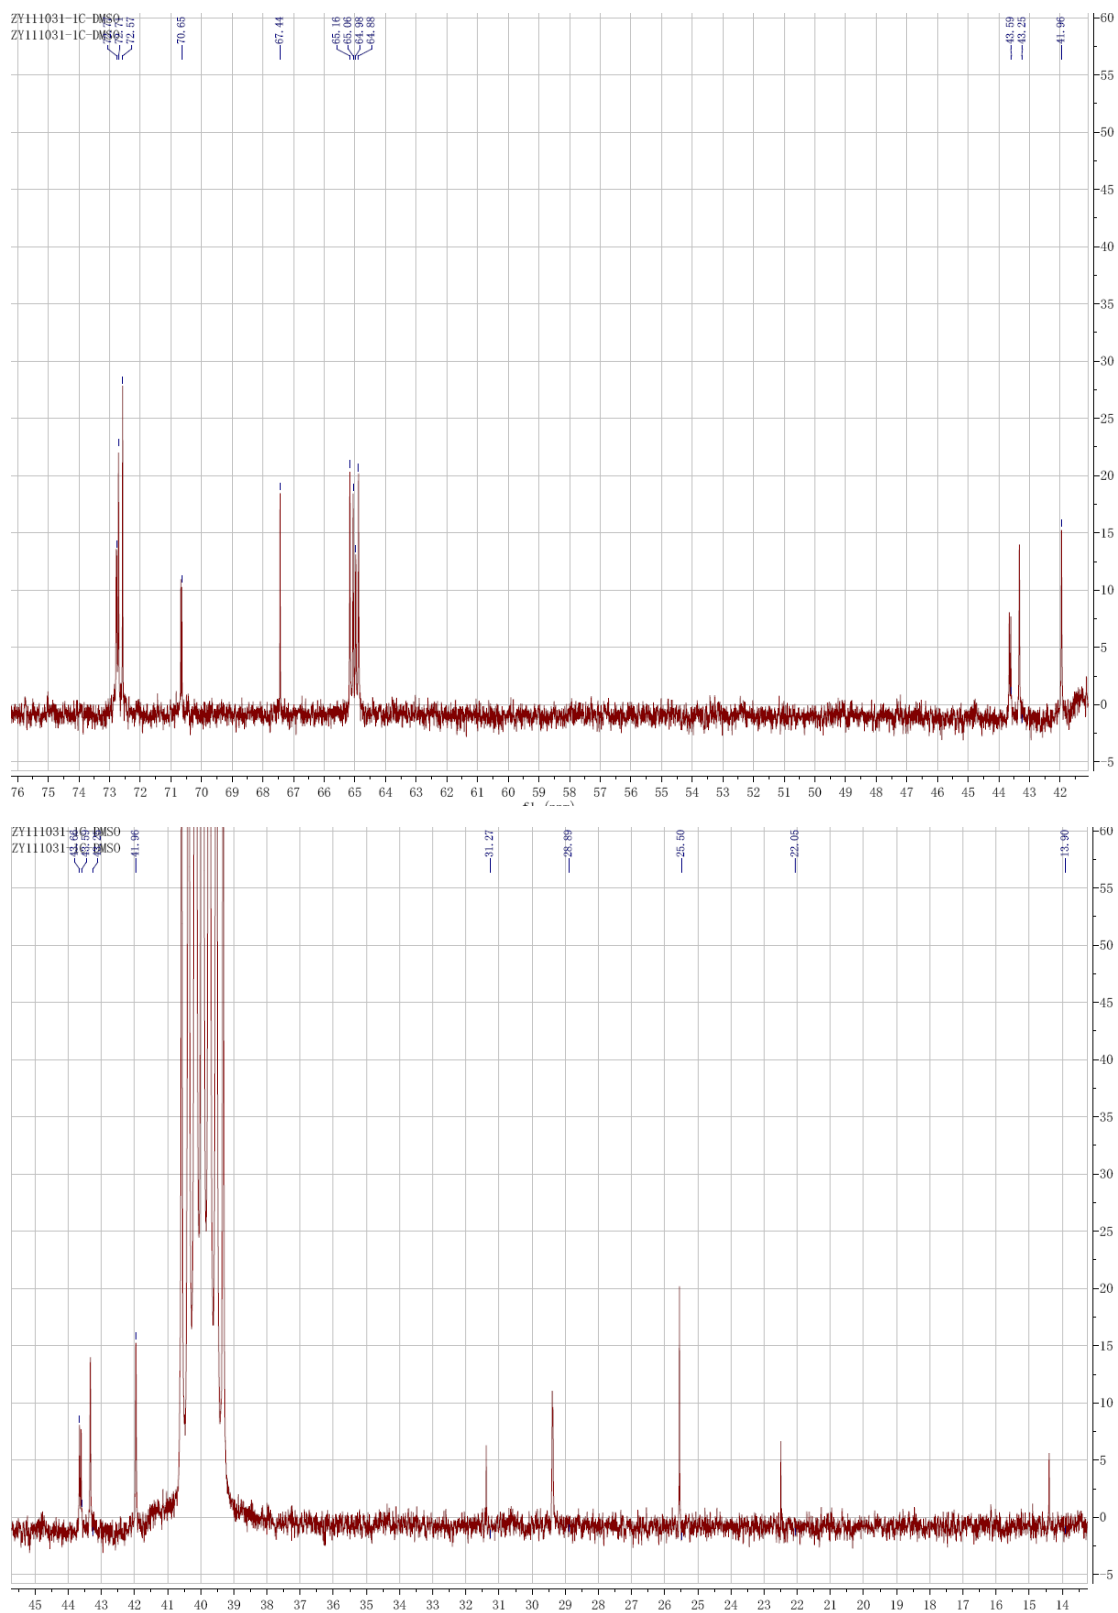

Fig. S8  $^{13}\text{C}$  NMR spectra of complex 1 ( $\text{DMSO-d}_6$ ).

Table S1 Kinetic analysis of the substitution reaction of complex **1** by CysA in DMSO at 37 °C.

|                                                    |       |       |       |       |       |
|----------------------------------------------------|-------|-------|-------|-------|-------|
| Complex <b>1</b> (mol L <sup>-1</sup> )            | 0.011 | 0.011 | 0.011 | 0.011 | 0.011 |
| CysA (mol L <sup>-1</sup> )                        | 0.034 | 0.069 | 0.138 | 0.207 | 0.276 |
| k <sub>obs</sub>                                   | 0.011 | 0.062 | 0.11  | 0.19  | 0.24  |
| k                                                  | 0.32  | 0.9   | 0.78  | 0.9   | 0.87  |
| t <sub>1/2</sub> (min)                             | 63.0  | 11.1  | 6.4   | 3.7   | 2.9   |
| Time for complete decomposition (min) <sup>a</sup> | 400   | 280   | 200   | 180   | 100   |

<sup>a</sup>Approximate time at which trace amount of monoiron species remained as indicated by the intensity of the infrared absorption bands.

Table S2 Cell viability at various concentration of complex **1**.

| <sup>a</sup> Con. | HepG2 | SD  | QSG-7701 | SD  |
|-------------------|-------|-----|----------|-----|
| 100               | 9.6   | 0.7 | 41.0     | 0.7 |
| 90                | 27.0  | 0.6 | 55.1     | 0.5 |
| 80                | 49.5  | 0.6 | 70.1     | 1.9 |
| 70                | 76.3  | 0.3 | 82.8     | 0.6 |
| 60                | 89    | 1.5 | 91.6     | 0.5 |
| 50                | 113   | 1.0 | 94       | 1.7 |
| 40                | 129.4 | 0.4 | 94.4     | 0.7 |
| 30                | 140.4 | 0.4 | 95       | 1.4 |

---

|             |       |     |       |     |
|-------------|-------|-----|-------|-----|
| 20          | 150.1 | 0.6 | 99    | 1.5 |
| 10          | 147   | 1.4 | 99.9  | 2.6 |
| 0 (control) | 100   | 1.4 | 100.0 | 0.4 |

---

<sup>a</sup>For each concentration, 6-folder of **CysA** is presented.
